# Supplementary material
Source: Springer Nature journal article supplement (https://www.springermedizin.de/resource/supplementary/12889_2009_1790_MOESM1_ESM.pdf/9504012)

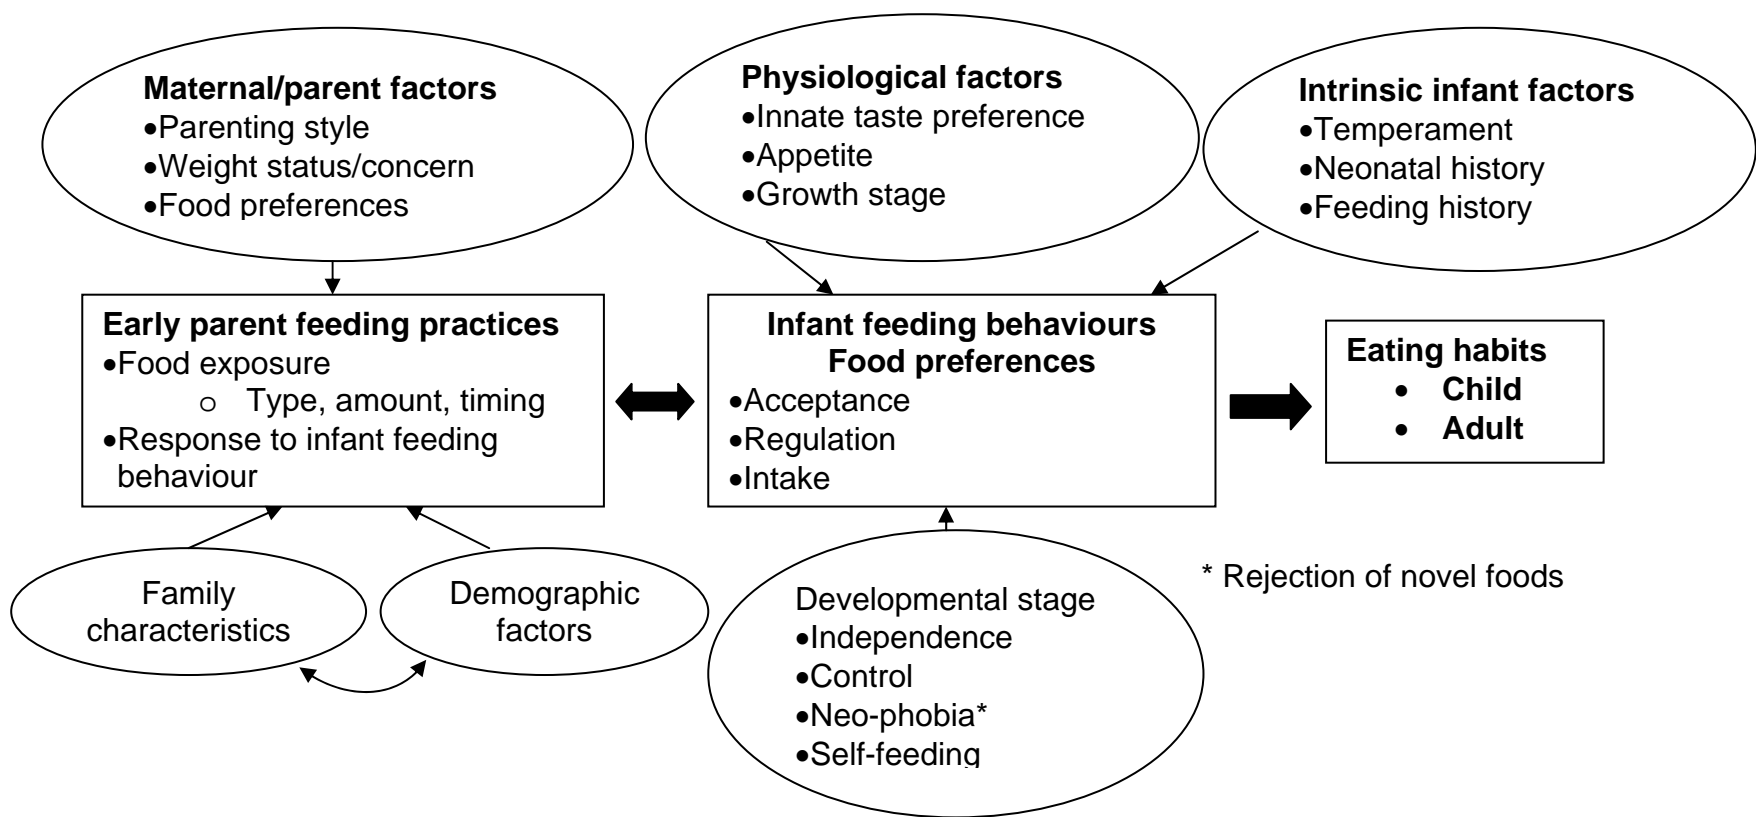

Supplement: MOESM1 [file 9504012]
